# Supplementary material for: Estimation of Newborn Risk for Child or Adolescent Obesity: Lessons from Longitudinal Birth Cohorts
Source: PLoS One. 2012 Nov 28;7(11):e49919. doi: 10.1371/journal.pone.0049919 (PMC3509134; doi:10.1371/journal.pone.0049919)
Supplement: Dataset S2 — Example of automatic calculator of risk for childhood obesity. (XLS) [file pone.0049919.s011.xls]

## Sheet: NFB1986
Predicted probability of childhood obesity from traditional risk factors.
Enter the variables values and get the predicted probability.
			Maternal BMI				35
			Paternal BMI				30
			Number of household members				3
			Maternal professional category (1-4)				2
			Gestational smoking (0=no, 1=yes)				0
			Birth weight (kg)				4
			Predicted probability				42.0676	%

## Sheet: Veneto
Predicted probability of childhood obesity from traditional risk factors.
Enter the variables values and get the predicted probability.
		Maternal BMI				28
		Paternal BMI				32
		Gender (0=M, 1=F)				0
		Predicted probability				18.8467	%

## Sheet: Viva
Predicted probability of childhood obesity from traditional risk factors.
Enter the variables values and get the predicted probability.
			Maternal BMI				25
			Paternal BMI				26
			Gestational weight gain (%)				25
			Gestational smoking (0=no, 1=yes)				1
			Race = White (0=no, 1=yes)				0
			Race = Black (0=no, 1=yes)				0
			Race = Hispanic (0=no, 1=yes)				0
			Race = Asian (0=no, 1=yes)				1
			Predicted probability				14.679	%
